# Supplementary figures and images for: Conformations, structural transitions and visible near-infrared absorption spectra of four-, five- and six-coordinated Cu(ii) aqua complexes
Source: Royal Society of Chemistry journal article supplement (doi:10.1039/b806423g), 2008-11-06

### Supporting information

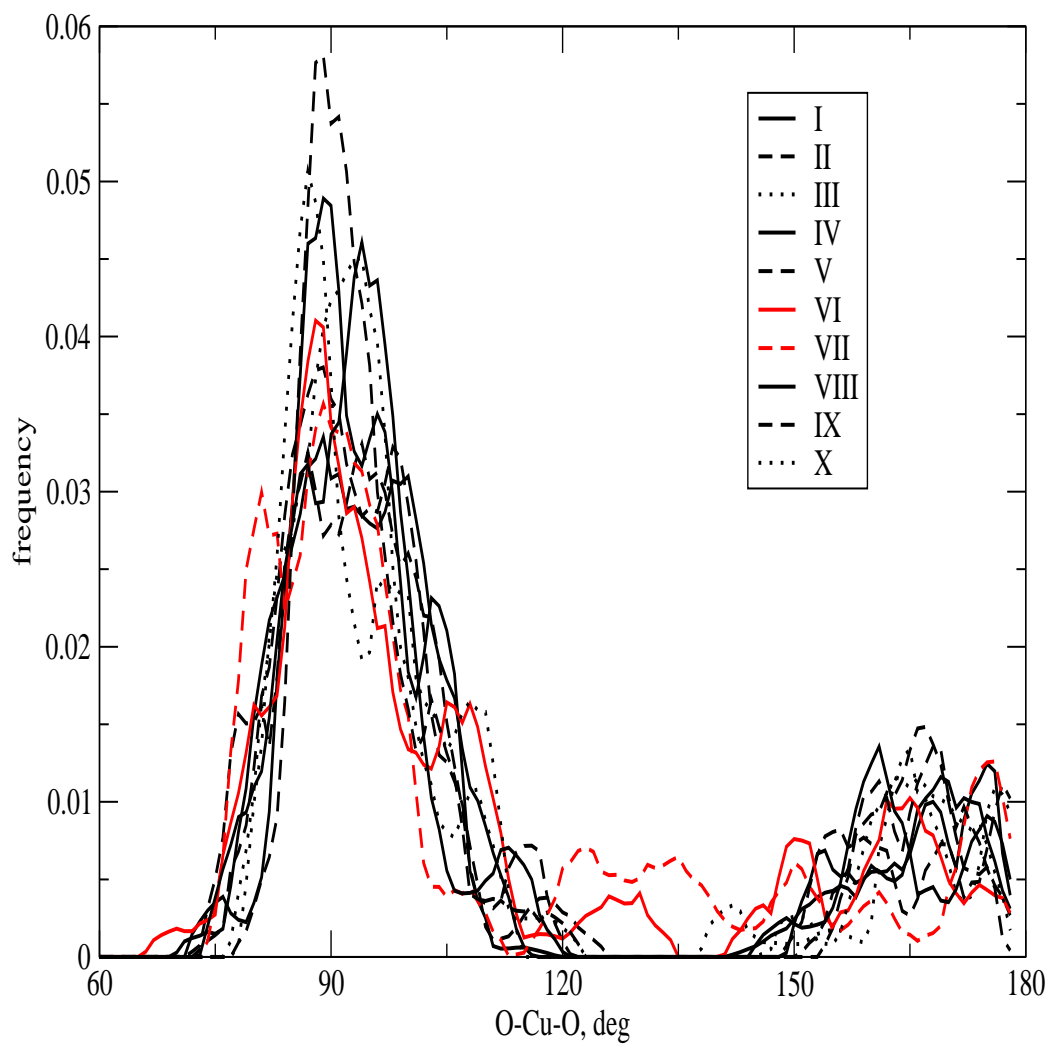

Figure 1s: Time evolution of angular distribution function.

Supplement: b806423g.pdf [file b806423g.pdf]
